# Supplementary material for: Toward Establishing a Tourism Data Space: Innovative Geo-Dashboard Development for Tourism Research and Management
Source: MDPI journal article supplement (doi:10.3390/smartcities7010026), 2024-02-14
Supplement: s1 [file s1]

## Supplementary Materials

**Table S1.** Number of regulated accommodations (hotels and apartments) exposed to floods.

| <i>Municipality</i>        | <i>Floods recurrence period</i> |              |             |
|----------------------------|---------------------------------|--------------|-------------|
|                            | <b>500 y</b>                    | <b>100 y</b> | <b>10 y</b> |
| ALCUDIA                    | 36                              | 0            | 0           |
| ANDRATX                    | 1                               | 0            | 0           |
| CALVIÀ                     | 29                              | 12           | 9           |
| CAMPANET                   | 1                               | 0            | 0           |
| FIELDS                     | 7                               | 0            | 0           |
| ESPORLES                   | 2                               | 0            | 0           |
| FELANITX                   | 2                               | 0            | 0           |
| INCA                       | 3                               | 0            | 0           |
| LLUCMAJOR                  | 5                               | 0            | 0           |
| MANACOR                    | 9                               | 5            | 0           |
| WALL                       | 14                              | 0            | 0           |
| PALMA                      | 5                               | 1            | 0           |
| POLLENÇA                   | 13                              | 2            | 0           |
| SOLLER                     | 21                              | 15           | 8           |
| SANT LLORENÇ DES CARDASSAR | 6                               | 6            | 0           |
| SANTA MARIA DEL CAMÍ       | 1                               | 0            | 0           |
| SANTANY?                   | 1                               | 0            | 0           |
| SELVA                      | 1                               | 0            | 0           |
| VALLDEMOSSA                | 1                               | 0            | 0           |
| TOTAL                      | 158                             | 41           | 17          |

**Table S2.** Number of Airbnb vacation houses by flood recurrence period exposed to floods.

| <i>Municipality</i> | <i>Flood recurrence periods</i> |              |             |
|---------------------|---------------------------------|--------------|-------------|
|                     | <b>500 y</b>                    | <b>100 y</b> | <b>10 y</b> |
| ALARÓ               | 1                               | 0            | 0           |
| ALCÚDIA             | 477                             | 0            | 0           |
| ANDRATX             | 6                               | 0            | 0           |
| ARIANY              | 1                               | 0            | 0           |
| ARTÀ                | 7                               | 0            | 0           |
| BÚGER               | 9                               | 0            | 0           |
| BUNYOLA             | 2                               | 0            | 0           |
| CALVIÀ              | 44                              | 15           | 10          |
| CAMPANET            | 6                               | 0            | 0           |
| FIELDS              | 126                             | 13           | 11          |
| CAPDEPERA           | 17                              | 0            | 0           |
| ESPORLES            | 15                              | 0            | 0           |
| FELANITX            | 11                              | 0            | 0           |
| INCA                | 7                               | 0            | 0           |
| LLOSETA             | 3                               | 0            | 0           |
| LLUCMAJOR           | 17                              | 0            | 0           |
| MANACOR             | 36                              | 17           | 4           |
| MANCOR DE LA VALL   | 3                               | 0            | 0           |
| MARRATXÍ            | 19                              | 11           | 1           |
| MONTUÏRI            | 1                               | 0            | 0           |
| WALL                | 84                              | 0            | 0           |
| PALMA               | 172                             | 96           | 6           |

|                            |      |     |     |
|----------------------------|------|-----|-----|
| PETRA                      | 4    | 0   | 0   |
| POLLENÇA                   | 433  | 39  | 10  |
| PUIGPUNYENT                | 3    | 0   | 0   |
| SA POBLA                   | 15   | 0   | 0   |
| SANT LLORENÇ DES CARDASSAR | 15   | 12  | 8   |
| SANTA MARGALIDA            | 4    | 0   | 0   |
| SANTANYÍ                   | 9    | 0   | 0   |
| SELVA                      | 1    | 0   | 0   |
| SES SALINES                | 1    | 0   | 0   |
| SINEU                      | 3    | 0   | 0   |
| SOLLER                     | 144  | 79  | 54  |
| SON SERVERA                | 10   | 0   | 0   |
| VALLDEMOSSA                | 1    | 0   | 0   |
| VILAFRANCA DE BONANY       | 1    | 0   | 0   |
| TOTAL                      | 1708 | 282 | 104 |

**Table S3.** Land-cover changes 2000-2018 by municipality.

| MUNICIPAL-<br>ITIES       | Artificialization Surfaces |                   |                     | Agriculture            |                   |                     | Forest                 |                   |                     |
|---------------------------|----------------------------|-------------------|---------------------|------------------------|-------------------|---------------------|------------------------|-------------------|---------------------|
|                           | Hectares 2018–2000         | % Differ-<br>ence | % Municipal<br>2018 | Hectares 2018–<br>2000 | % Differ-<br>ence | % Municipal<br>2018 | Hectares 2018–<br>2000 | % Differ-<br>ence | % Municipal<br>2018 |
| Alaró                     | 3.92                       | 4.38              | 2.04                | –301.83                | –11.28            | 51.99               | 297.91                 | 16.53             | 45.97               |
| Alcúdia                   | 285.51                     | 48.17             | 14.71               | –526.28                | –18.90            | 37.82               | 167.07                 | 6.89              | 43.40               |
| Algaida                   | –135.39                    | –57.34            | 1.12                | –40.05                 | –0.57             | 77.61               | 175.43                 | 10.13             | 21.26               |
| Andratx                   | –58.77                     | –10.08            | 6.77                | –272.56                | –17.29            | 16.84               | 330.09                 | 5.91              | 76.37               |
| Ariany                    | –1.33                      | –4.42             | 1.24                | –81.36                 | –4.25             | 79.37               | 82.69                  | 22.62             | 19.39               |
| Artà                      | 68.01                      | 30.35             | 2.09                | –1554.21               | –24.79            | 33.79               | 1483.90                | 19.89             | 64.10               |
| Banyalbufar               | 31.43                      |                   | 1.75                | –137.61                | –33.51            | 15.22               | 106.06                 | 7.67              | 83.02               |
| Binissalem                | –17.15                     | –13.30            | 3.76                | –57.65                 | –2.09             | 90.98               | 74.80                  | 91.68             | 5.26                |
| Búger                     | 25.14                      |                   | 3.04                | –42.48                 | –5.61             | 86.27               | 17.35                  | 24.37             | 10.69               |
| Bunyola                   | 35.86                      | 11.55             | 4.09                | –193.41                | –6.42             | 33.32               | 159.68                 | 3.11              | 62.59               |
| Calvià                    | 215.99                     | 9.23              | 17.71               | –567.57                | –15.65            | 21.19               | 348.88                 | 4.12              | 61.08               |
| Campanet                  | 15.60                      | 56.99             | 1.24                | –129.87                | –6.86             | 50.97               | 114.27                 | 7.42              | 47.79               |
| Fields                    | 61.79                      | 19.45             | 2.54                | –339.60                | –2.91             | 75.87               | 187.34                 | 6.88              | 19.47               |
| Capdepera                 | 178.81                     | 37.75             | 11.93               | –492.16                | –18.65            | 39.24               | 311.34                 | 13.20             | 48.79               |
| Consell                   | –8.87                      | –12.16            | 4.68                | 8.87                   | 0.68              | 95.32               | 0.00                   | #DIV/0!           | 0.00                |
| Costitx                   | 0.00                       | 0.00              | 0.00                | –56.03                 | –4.20             | 83.23               | 56.03                  | 27.82             | 16.77               |
| Deyá                      | 27.31                      | 0.00              | 1.81                | –178.93                | –28.49            | 29.83               | 150.94                 | 17.20             | 68.31               |
| Escorca                   | –40.06                     | –100.00           | 0.00                | –439.45                | –62.53            | 1.90                | 631.43                 | 4.90              | 97.28               |
| Esporles                  | –20.78                     | –13.28            | 3.85                | –172.78                | –14.51            | 28.86               | 193.56                 | 8.88              | 67.29               |
| Estellencs                | 0.00                       | 0.00              | 0.00                | –88.36                 | –24.82            | 20.11               | 88.20                  | 9.05              | 79.88               |
| Felanitx                  | 193.83                     | 44.86             | 3.69                | –857.18                | –6.13             | 77.43               | 662.60                 | 26.12             | 18.87               |
| Fornalutx                 | 4.16                       | 0.00              | 0.21                | –158.59                | –24.66            | 24.89               | 154.36                 | 11.84             | 74.90               |
| Inca                      | 49.13                      | 18.89             | 5.31                | –115.39                | –2.31             | 83.81               | 66.26                  | 11.66             | 10.89               |
| Lloret de Vis-<br>talegre | 0.00                       | 0.00              | 0.00                | 48.63                  | 3.66              | 79.00               | –48.63                 | –11.73            | 21.00               |
| Lloseta                   | 62.57                      | 193.32            | 7.85                | –126.71                | –13.81            | 65.40               | 64.13                  | 24.74             | 26.74               |
| Llubí                     | 6.07                       | 13.03             | 1.51                | –117.88                | –3.54             | 92.09               | 111.82                 | 100.39            | 6.40                |
| Llucmajor                 | 137.93                     | 12.34             | 3.84                | –741.87                | –3.58             | 61.22               | 601.23                 | 5.56              | 34.93               |
| Manacor                   | 288.18                     | 34.56             | 4.32                | –1193.41               | –6.07             | 71.12               | 903.51                 | 16.50             | 24.55               |
| Mancor de la<br>Vall      | 13.99                      | 116.69            | 1.31                | –222.54                | –21.55            | 40.75               | 208.56                 | 22.12             | 57.94               |
| Maria de la<br>Salut      | –7.66                      | –10.46            | 2.15                | –85.01                 | –3.73             | 72.03               | 92.67                  | 13.34             | 25.82               |
| Marratxí                  | 58.67                      | 3.96              | 28.42               | –121.54                | –3.44             | 63.05               | 62.87                  | 15.74             | 8.53                |
| Montuïri                  | 22.22                      | 85.20             | 1.18                | –15.48                 | –0.42             | 89.91               | –6.74                  | –1.81             | 8.91                |
| Wall                      | 122.52                     | 64.20             | 5.35                | –236.40                | –6.43             | 58.72               | 71.50                  | 13.93             | 9.99                |
| Palma                     | 837.18                     | 14.30             | 34.27               | –900.36                | –9.52             | 43.82               | 59.14                  | 1.40              | 21.88               |
| Petra                     | 40.38                      | 50.20             | 1.73                | –264.00                | –4.84             | 74.24               | 223.62                 | 15.34             | 24.03               |
| Pollença                  | 282.99                     | 99.01             | 3.77                | –356.89                | –8.82             | 24.48               | 69.48                  | 0.65              | 71.72               |

|                                   |         |        |        |           |        |         |          |       |         |
|-----------------------------------|---------|--------|--------|-----------|--------|---------|----------|-------|---------|
| <b>Porreres</b>                   | 78.59   | 71.56  | 2.17   | -489.54   | -6.61  | 79.68   | 410.95   | 35.26 | 18.15   |
| <b>Puigpunyent</b>                | -10.36  | -6.49  | 3.53   | -219.08   | -20.97 | 19.53   | 229.44   | 7.59  | 76.94   |
| <b>Sa Pobla</b>                   | 73.09   | 40.68  | 5.21   | -107.30   | -2.99  | 71.67   | -23.67   | -3.01 | 15.72   |
| <b>Sant Joan</b>                  | 44.91   | 0.00   | 1.17   | -129.21   | -3.81  | 84.66   | 84.29    | 18.27 | 14.17   |
| <b>Sant Llorenç des Cardassar</b> | 105.80  | 32.81  | 5.23   | -731.22   | -11.52 | 68.53   | 625.21   | 41.01 | 26.24   |
| <b>Santa Eugènia</b>              | -66.19  | -72.55 | 1.24   | 34.12     | 2.67   | 64.84   | 32.07    | 4.90  | 33.93   |
| <b>Santa Margalida</b>            | 92.72   | 27.85  | 4.93   | -552.25   | -9.81  | 58.79   | 459.03   | 17.16 | 36.28   |
| <b>Santa Maria del Camí</b>       | -15.59  | -12.40 | 2.93   | -19.03    | -0.79  | 63.47   | 34.62    | 2.82  | 33.60   |
| <b>Santanyí</b>                   | 25.52   | 3.57   | 5.96   | -677.40   | -7.25  | 69.73   | 654.12   | 28.01 | 24.05   |
| <b>Rainforest</b>                 | -8.43   | -19.37 | 0.72   | -70.79    | -2.44  | 58.15   | 79.22    | 4.12  | 41.13   |
| <b>Sencelles</b>                  | -309.71 | -84.17 | 1.10   | 333.99    | 7.88   | 86.59   | -24.28   | -3.60 | 12.30   |
| <b>Ses Salines</b>                | 26.22   | 13.62  | 5.63   | -96.45    | -3.18  | 75.65   | 19.88    | 3.24  | 16.29   |
| <b>Sineu</b>                      | 28.08   | 27.25  | 2.75   | -128.40   | -3.29  | 79.06   | 100.31   | 13.07 | 18.20   |
| <b>Sóller</b>                     | 161.79  | 81.67  | 8.44   | -791.15   | -37.01 | 31.60   | 628.55   | 32.64 | 59.94   |
| <b>Son Servera</b>                | 30.96   | 7.65   | 10.26  | -215.27   | -7.98  | 58.42   | 184.00   | 16.05 | 31.31   |
| <b>Valldemossa</b>                | 6.11    | 9.44   | 1.65   | -135.49   | -12.28 | 22.60   | 129.31   | 4.15  | 75.75   |
| <b>Vilafranca de Bonany</b>       | 15.97   | 26.10  | 3.22   | -45.10    | -2.00  | 92.17   | 29.14    | 35.86 | 4.61    |
| <b>Grand total</b>                | 3058.67 | 15.43  | 955.61 | -15167.50 | -7.02  | 8389.73 | 11925.55 | 9.68  | 5642.23 |

**Table S4.** Python program for extracting the Flickr Python program.

```
import requests
import csv
from google.colab import drive

# Mount Google Drive
drive.mount('/content/drive')

# Flickr API settings
API_ENDPOINT = "https://api.flickr.com/services/rest/"
API_KEY = "662028500c11bca5d9272016d3d4369" # Replace with your real API key

# Function to obtain metadata of the photos inside the bounding box of Mallorca
def get_photo_metadata(bbox, min_date, max_date, page=1):
    params = {
        "method": "flickr.photos.search",
        "api_key": API_KEY,
        "bbox": bbox,
        "min_upload_date": min_date,
        "max_upload_date": max_date,
        "extras": "geo,owner_name,date_taken",
        "format": "json",
        "nojsoncallback": "1",
        "page": page,
        "per_page": 500 # Maximum allowed by Flickr
    }

    response = requests.get(API_ENDPOINT, params=params)
```

```

data = response.json()
metadata = [{
    "id": photo["id"],
    "owner_name": photo["ownername"],
    "date_taken": photo["datetaken"],
    "latitude": photo["latitude"],
    "longitude": photo["longitude"]: photo["longitude"].
} for photo in data["photos"]["photo"] if photo.get("latitude") and
photo.get("longitude")]
return metadata, data["photos"]["pages"]]

# Define the bounding box for Majorca
bbox = "2.2534,39.2415,3.4663,39.9612"
min_date = "2015-01-01"
max_date = "2019-10-31"

all_metadata = []

# Collect metadata from all pages
metadata, total_pages = get_photo_metadata(bbox, min_date, max_date)
all_metadata.extend(metadata)
for page in range(2, total_pages + 1):
    meta, _ = get_photo_metadata(bbox, min_date, max_date, page)
    all_metadata.extend(meta)

# Convert and save metadata directly to CSV file
def save_in_csv(data, path_csv):
    with open(path_csv, 'w', newline='') as file:
        csv_writer = csv.DictWriter(file, fieldnames=["id", "owner_name", "date_taken",
"latitude", "longitude"])
        csv_writer.writeheader()
        for item in data:
            csv_writer.writerow(item)

# Specify the path in your Google Drive for the CSV file
path_csv = '/content/drive/My Drive/fotos_mallorca_2015_2019_attributes.csv'.

# Save data in CSV
save_in_csv(all_metadata, path_csv)

print(f "Metadata for {len(all_metadata)} photos has been saved to the file {path_csv}." )

```
